# Supplementary material for: Translation and codon usage regulate Argonaute slicer activity to trigger small RNA biogenesis
Source: PubMed Central journal article supplement (PMC8190271; doi:10.1038/s41467-021-23615-w), 2021-06-09
Supplement: 41467_2021_23615_MOESM1_ESM.pdf [file 41467_2021_23615_MOESM1_ESM.pdf]

**Translation and codon usage regulate Argonaute slicer activity to trigger  
small RNA biogenesis.**

Singh *et al.*, 2021

Supplementary information

## SUPPLEMENTARY FIGURES

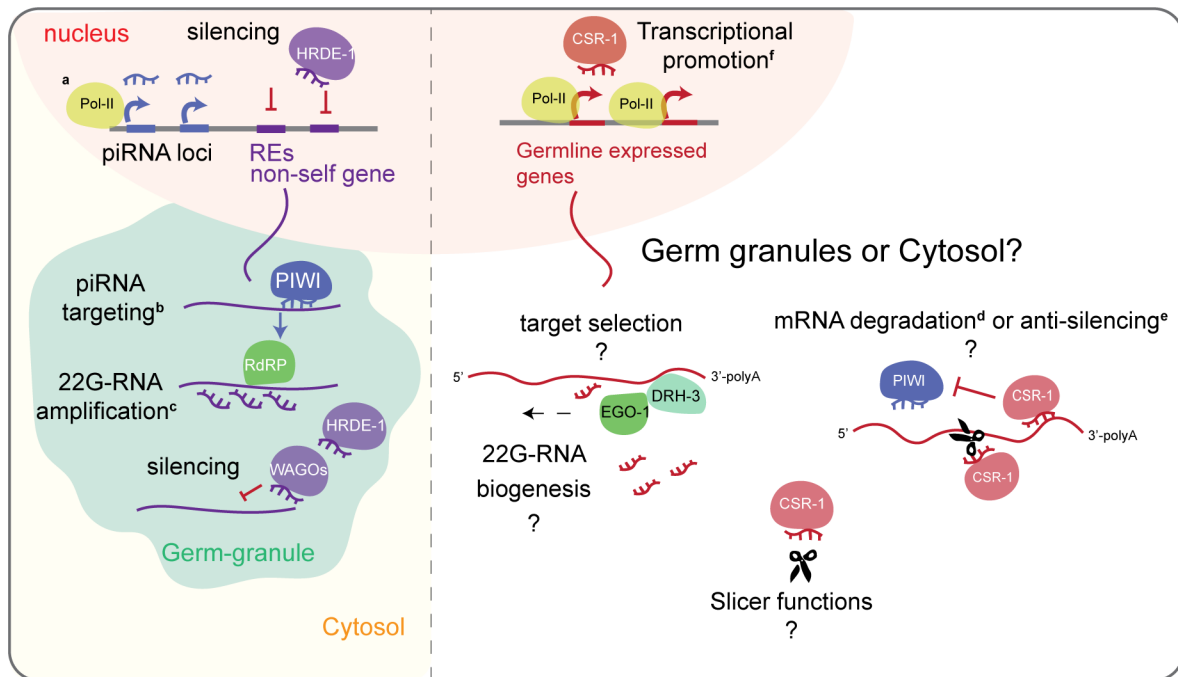

**Supplementary Fig. 1: Current model for germline endogenous 22G-RNAs biogenesis and functions.** **a**, PIWI interacting-RNAs (piRNAs, 21U-RNAs) are transcribed by RNA Polymerase II. **b-c**, piRNAs are then loaded by PIWI, which recruit an RNA-dependent RNA polymerase in germ granules to produce secondary antisense small RNAs (22G-RNAs) loaded by WAGOs, including nuclear Argonaute HRDE-1 and silence foreign transcripts like REs. CSR-1 loads 22G-RNAs synthesized by RdRP EGO-1. No trigger for CSR-1 22G-RNAs is known. Also, it is not clear where CSR-1 22G-RNAs are produced. CSR-1 possess a catalytic activity demonstrated in vitro. There is still a lack of clarity on the different proposed functions of CSR-1 and its slicer activity. **d**, Slicer activity is proposed to degrade mRNA either for maternal mRNA clearance in embryo or fine-tuning of mRNA levels to be delivered to oocytes. **e**, On the other hand, it is also proposed as an anti-silencer to PIWI mediated silencing of germline genes mRNAs and **f**, promote transcription of targets. However, it is not clear how CSR-1 targets are selected and how the RdRP EGO-1 mediated biogenesis of 22G-RNAs happens and where these activities occur- germ granule or cytosol?

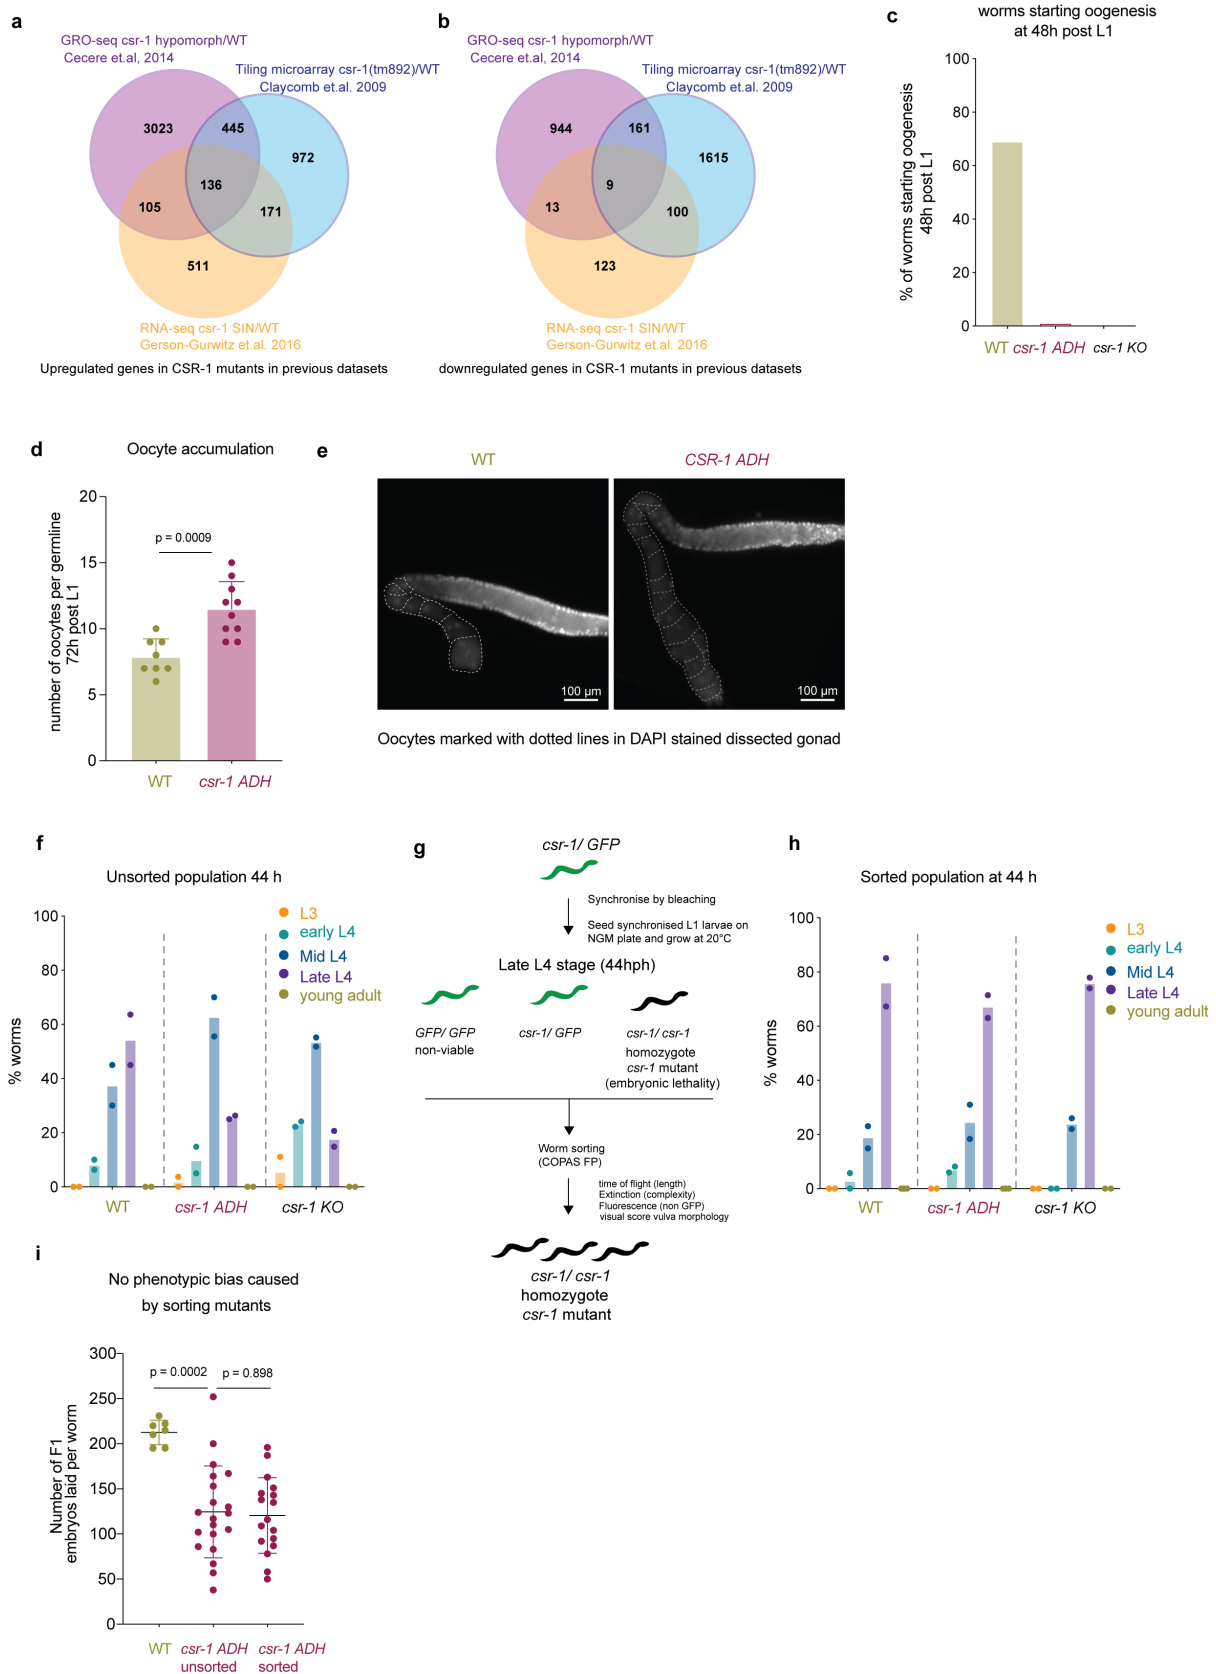

## Supplementary Fig. 2: Phenotypic characterization of CSR-1 mutants.

**a-b**, Venn diagram showing overlap of upregulated (**a**) and downregulated (**b**) gene in different CSR-1 mutants in hermaphrodites investigated in the previous publications. No significant

overlap is observed. **c**, Comparison of the number of worms with oocytes at 48 h between WT strain, *csr-1* ADH and *csr-1* KO (n = 60 worms). **d**, Comparison of the number of oocytes present in the germline of adult worms at 72 h post-hatching between WT strain and *csr-1* ADH (n = 9 worms). **e**, Representative images of DAPI stained germlines of WT and *csr-1* ADH showing increased accumulation of oocytes in *csr-1* ADH for data represented in (**d**). Oocytes are marked by white dashed lines (n = 9 worms). **f**, Distribution of WT, *csr-1* ADH and *csr-1* KO population in different larval stages after synchronization at 44 h post-hatching. Data are represented as mean (bar) for two biological replicates. **g**, Scheme for sorting synchronized WT or mutant worms using COPAS biosorter. **h**, Distribution of WT, *csr-1* ADH and *csr-1* KO population in different larval stages after sorting the synchronized worms at 44 h post-hatching. Data are represented as mean (bar) for two biological replicates used for sequencing in Figure 1 and Supplementary Figure 4. **i**, Brood size of *csr-1* ADH strain before and after sorting. Data are represented as mean  $\pm$  s.d. Two-tailed P values were calculated using Mann–Whitney–Wilcoxon tests. (n=7 animals for WT, n=20 animals for *csr-1* ADH unsorted, n=17 animals for *csr-1* ADH sorted). Source data are provided as a Source Data file.

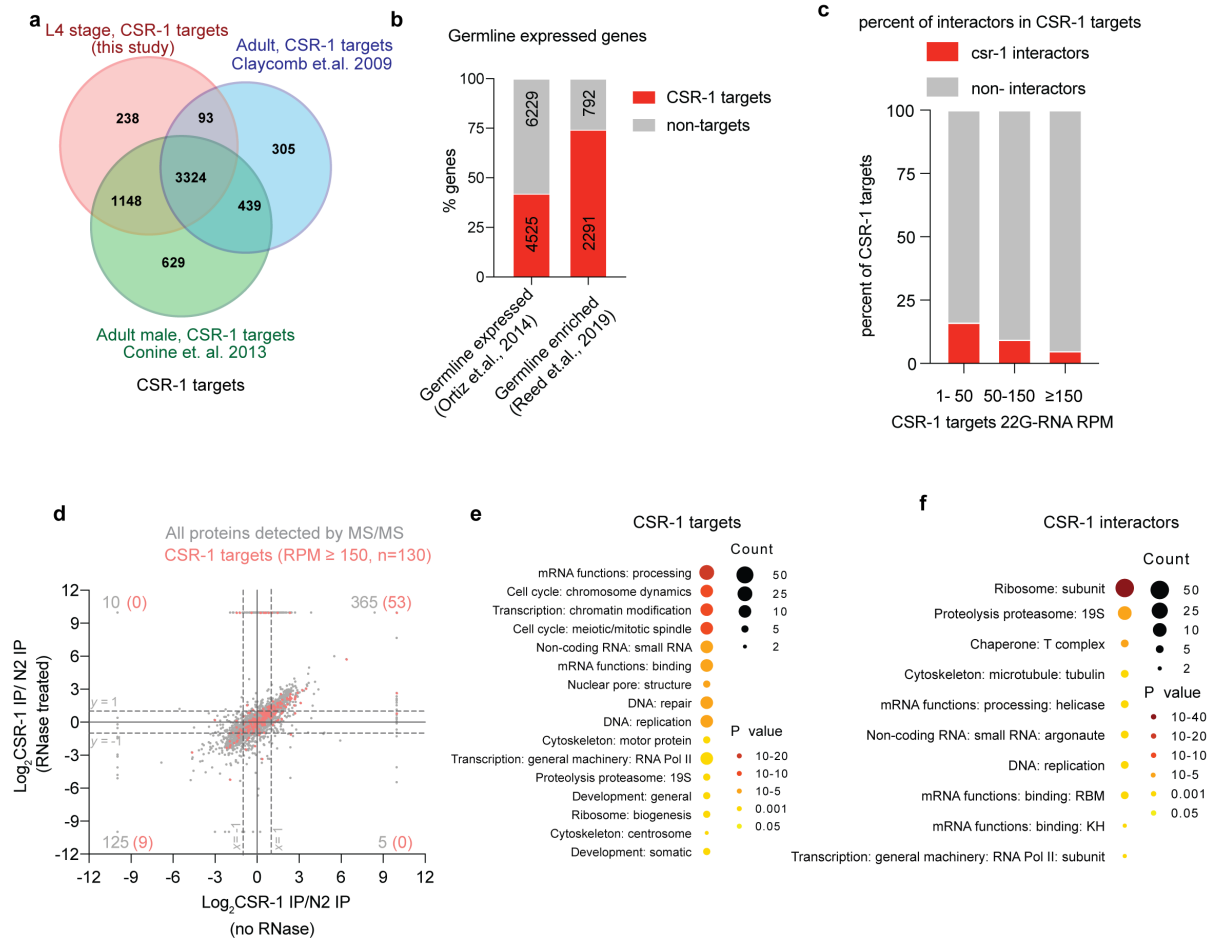

### Supplementary Fig. 3: Phenotypic characterization of CSR-1 mutants.

**a**, Venn diagram showing overlap of CSR-1 targets identified by CSR-1 IP in the current study and previous publications. **b**, distribution of CSR-1 targets genes as a percent of the total for germline expressed and germline enriched genes. **c**, distribution of CSR-1 interactors as a percent of total for three categories of CSR-1 targets (with RPM of 1-50, 50-150 or  $\geq 150$  in the CSR-1 IP). **d**, Scatter plot comparing the log<sub>2</sub> fold changes in CSR-1 interactors (IP-MS/MS) to control IPs performed in WT strain in the absence of RNase treatment (x-axis) to the IPs performed after RNase treatment. CSR-1 targets with 22G-RNA  $\geq 150$  RPM in the CSR-1 IP are highlighted. Dots in grey are all proteins detected in MS/MS analysis. Number in grey refers to all interactors with log<sub>2</sub> fold change of  $\geq 1$  and p-value  $\leq 0.05$  for each quadrant. The number in parenthesis is CSR-1 targets with 22G-RNA  $\geq 150$  RPM. Enrichment factor for CSR-1 targets is 6.1 with  $p < 1.6e^{-28}$ .  $n = 4$  biological replicates. **e-f**, gene categories enriched in CSR-1 targets (22G-RNA  $\geq 150$  RPM) (**e**) or CSR-1 interactors (**f**). Figures generated using WormCat. Source data are provided as a Source Data file.

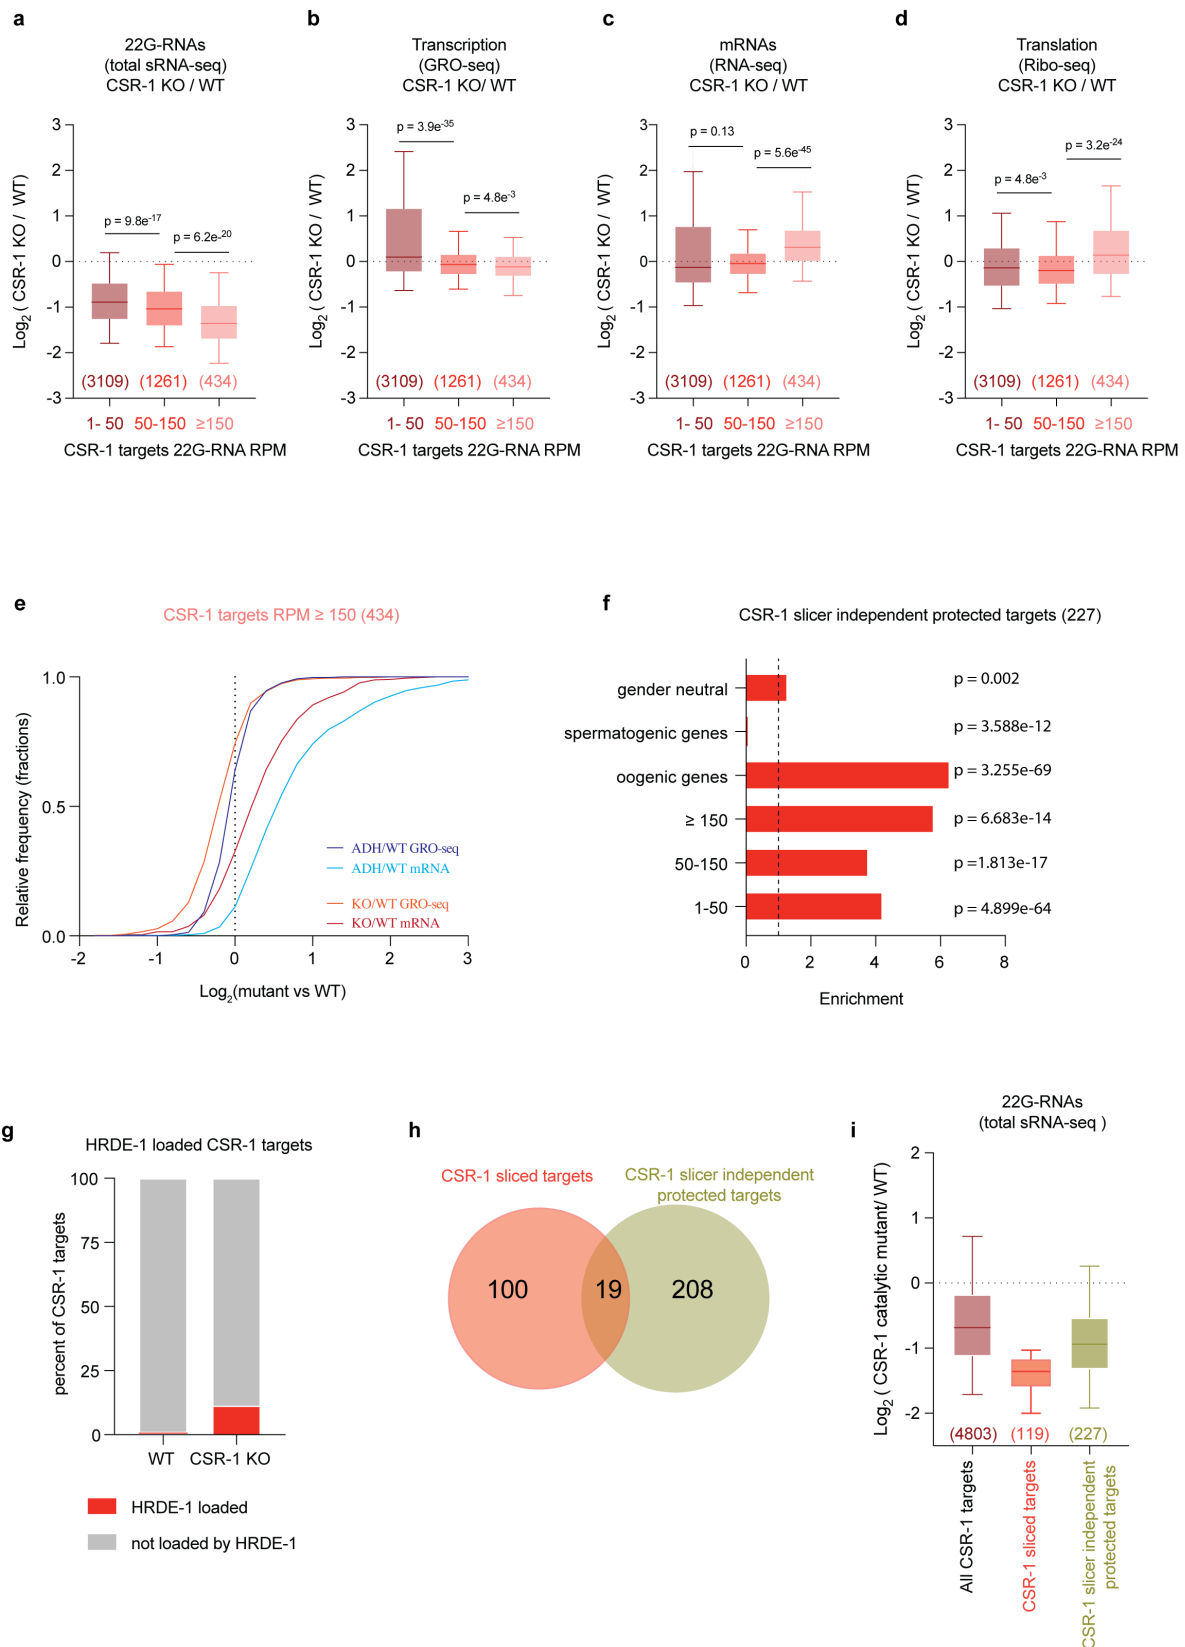

**Supplementary Fig. 4: Gene expression analyses in *csr-1* KO mutant.**

**a-d**, Box plots showing the  $\text{log}_2$  fold change of total 22G-RNAs (sRNA-seq) (**a**); nascent RNAs (GRO-seq) (**b**); or mRNAs (RNA-seq) (**c**); or mRNAs engaged in translation (Ribo-seq) (**d**),

in *csr-1* KO compared to WT strain. CSR-1 targets are categorized based on the abundance of the 22G-RNA in CSR-1 IP with 1-50 RPM, 50-150 RPM, or  $\geq 150$  RPM (see Supplementary Data 1 for gene lists). The line indicates the median value, the box indicates the first and third quartiles, and the whiskers indicate the 5<sup>th</sup> and 95<sup>th</sup> percentiles, excluding outliers. Two-tailed P values were calculated using Mann–Whitney–Wilcoxon tests. The sample size n (genes) is indicated in parentheses. Data is an average of 2 biological replicates. **e**, Cumulative frequency distribution for CSR-1 targets with RPM  $\geq 150$ . The comparison shows GRO-seq ( $p = 2e^{-11}$ ) and RNA-seq ( $p = 9e^{-19}$ ) for *csr-1* KO for *csr-1* ADH compared to WT. Two-tailed P values were calculated using Mann–Whitney–Wilcoxon tests. The sample size n (genes) is indicated in parentheses. Data is an average of 2 biological replicates. **f**, Enrichment of CSR-1 slicer independent protected targets (Supplementary Data 1) in different CSR-1 targets categories based on 22G-RNA abundance, gender-neutral spermatogenic and oogenic genes. The dashed line at 1 indicates no enrichment. P values were calculated by Exact hypergeometric probability using the automated tool available at [http://nemates.org/MA/progs/overlap\\_stats.html](http://nemates.org/MA/progs/overlap_stats.html). **g**, distribution of CSR-1 target genes with 22G-RNA loaded by HRDE-1 as a percent of the total in WT or *csr-1* KO strain. **h**, Venn diagram showing overlap of CSR-1 sliced targets (targets with 2-fold upregulated mRNAs in *csr-1* ADH with 2-fold depleted 22G-RNAs, Fig. 1b and Supplementary Data 1) with CSR-1 protected targets (Supplementary Data 1) **i**, Box plots showing the log<sub>2</sub> fold change of total 22G-RNAs (sRNA-seq) in *csr-1* ADH compared to WT strain for all CSR-1 targets, CSR-1 sliced targets and CSR-1 protected targets. The line indicates the median value, the box indicates the first and third quartiles, and the whiskers indicate the 5<sup>th</sup> and 95<sup>th</sup> percentiles, excluding outliers. Two-tailed P values were calculated using Mann–Whitney–Wilcoxon tests. The sample size n (genes) is indicated in parentheses. Data is an average of 2 biological replicates. Source data are provided as a Source Data file.





co-purifying sRNAs from control, WT FLAG::CSR-1 and FLAG::CSR-1 ADH immunoprecipitates. Immunoblot for WT CSR-1 and CSR-1 ADH using anti-FLAG antibody in the IPs and inputs. GAPDH was used as a loading control. The experiment was reproduced thrice. **c**, Box plot showing  $\log_2$  fold change in 22G-RNAs in IPs of CSR-1 ADH compared to WT CSR-1 on CDS and 3'UTR. The distribution for the 22G-RNA in CSR-1 IP for CSR-1 targets with 1-50 RPM, 50-150 RPM, or  $\geq 150$  RPM (see Supplementary Data 1 for gene lists). The sample size  $n$  (genes) is indicated in parentheses. Data is an average of 2 biological replicates. **d**, Experimental scheme and **e**, fluorescent images of live animals expressing Degron::mCherry::3xFLAG::HA:: CSR-1 used for CSR-1 depletion experiments for Fig. 2g-i, and Supplementary Fig. 5f-h. Auxin treatment completely depletes CSR-1 in the germline. The image is representative of at least ten individual germlines from two biological replicates. **f**,  $\log_2$  fold change in expression of RdRP *ego-1* mRNA and *glh-4* (CSR-1 target misregulated upon CSR-1 depletion) upon *ego-1* RNAi compared to control RNAi by qPCR for two biological replicates used for sequencing 22G-RNAs in Fig. 2g-i and Supplementary Fig. 5g-h. Data shows mean. **g**, Metaprofile analysis as in (Fig. 2g) showing the distribution of normalized total 22G-RNA reads (RPM) across CSR-1 targets (22G-RNA  $\geq 1$  RPM) upon *ego-1* RNAi and Control RNAi treated in degron control. **h**, Box-plot as in (Fig. 2h) showing the  $\log_2$  fold change in the amount of 22G-RNA generated from CDS and 3' UTR of CSR-1 targets (22G-RNA  $\geq 1$  RPM) in *ego-1* RNAi compared to control RNAi treated in degron control. Data is an average of 2 biological replicates. For all the box plots, the line indicates the median value, the box indicates the first and third quartiles, and the whiskers indicate the 5<sup>th</sup> and 95<sup>th</sup> percentiles, excluding outliers. Two-tailed P values were calculated using Mann–Whitney–Wilcoxon tests. Source data are provided as a Source Data file.

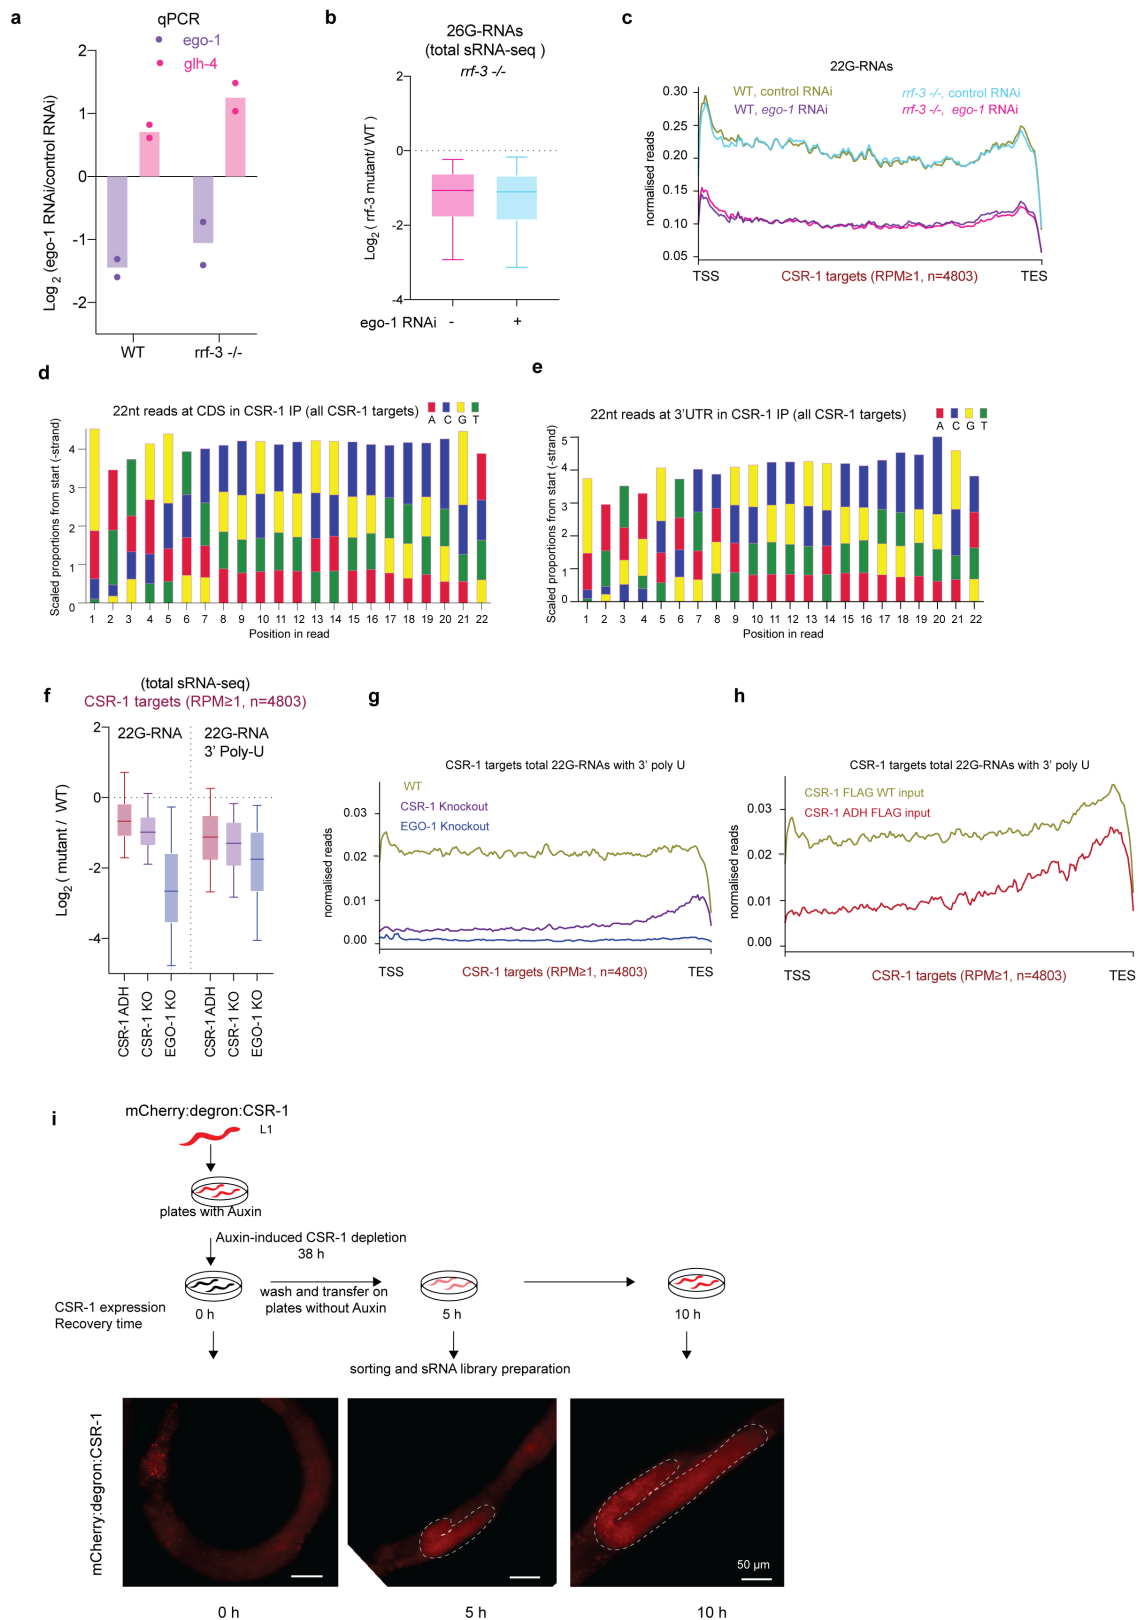

**Supplementary Fig. 6: Characterization of CSR-1 22G-RNAs.**

**a**, Log<sub>2</sub> fold change in expression of RdRP *ego-1* mRNA and *glh-4* (CSR-1 target misregulated upon CSR-1 depletion) upon *ego-1* RNAi compared to control RNAi by qPCR in WT and *rrf-1*<sup>-/-</sup>, for two biological replicates used for sequencing 22G-RNAs in Supplementary Fig. 6b-

c. Data shows mean. **b**, Box plot showing  $\log_2$  fold change in total 26G-RNAs in *rrf-3*  $-/-$  compared to WT in presence and absence of *ego-1* RNAi. The line indicates the median value, the box indicates the first and third quartiles, and the whiskers indicate the 5<sup>th</sup> and 95<sup>th</sup> percentiles, excluding outliers. Two-tailed P values were calculated using Mann–Whitney–Wilcoxon tests. Data is an average of 2 biological replicates. **c**, Metaprofile analysis showing the distribution of normalized 22G-RNA (sRNA-seq) reads (RPM) along all CSR-1 targets ( $\geq 1$  RPM, n= 4803) in WT or *rrf-3*  $-/-$  in control and *ego-1* RNAi. TSS indicates the transcriptional start site, TES indicates the transcriptional termination site. The average of two biological replicates is shown. **d-e**, scaled proportions of nucleotide composition on each position of reads for sRNAs from all CSR-1 targets (n=4803) co-purifying with CSR-1 at CDS (coding sequence) (**d**) and 3' UTR (**e**). **f**, Box plot showing  $\log_2$  fold change in total 22G-RNAs of 22G RNAs with 3'poly U for *csr-1* ADH, *csr-1* KO and *ego-1* KO compared to WT. The line indicates the median value, the box indicates the first and third quartiles, and the whiskers indicate the 5<sup>th</sup> and 95<sup>th</sup> percentiles, excluding outliers. Two-tailed P values were calculated using Mann–Whitney–Wilcoxon tests. The sample size n (genes) is indicated in parentheses. Data is the mean of 2 biological replicates. **g-h**, Metaprofile analysis showing the distribution of normalized 22G-RNA with 3'poly U reads along all CSR-1 targets ( $\geq 1$  RPM, n= 4803) in WT, *csr-1* KO and *ego-1* KO (**g**) and WT *csr-1* and *csr-1* ADH. TSS indicates the transcriptional start site, TES indicates the transcriptional termination site. The average of two biological replicates is shown. **i**, Experimental scheme and fluorescent images of live animals expressing Degron::mCherry::3xFLAG::HA::CSR-1 used for CSR-1 expression recovery for 0, 5 or 10 h after depletion for 38 h experiments for Fig. 2j-k. Images are representative of at least 10 individual germlines from two biological replicates. Source data are provided as a Source Data file.

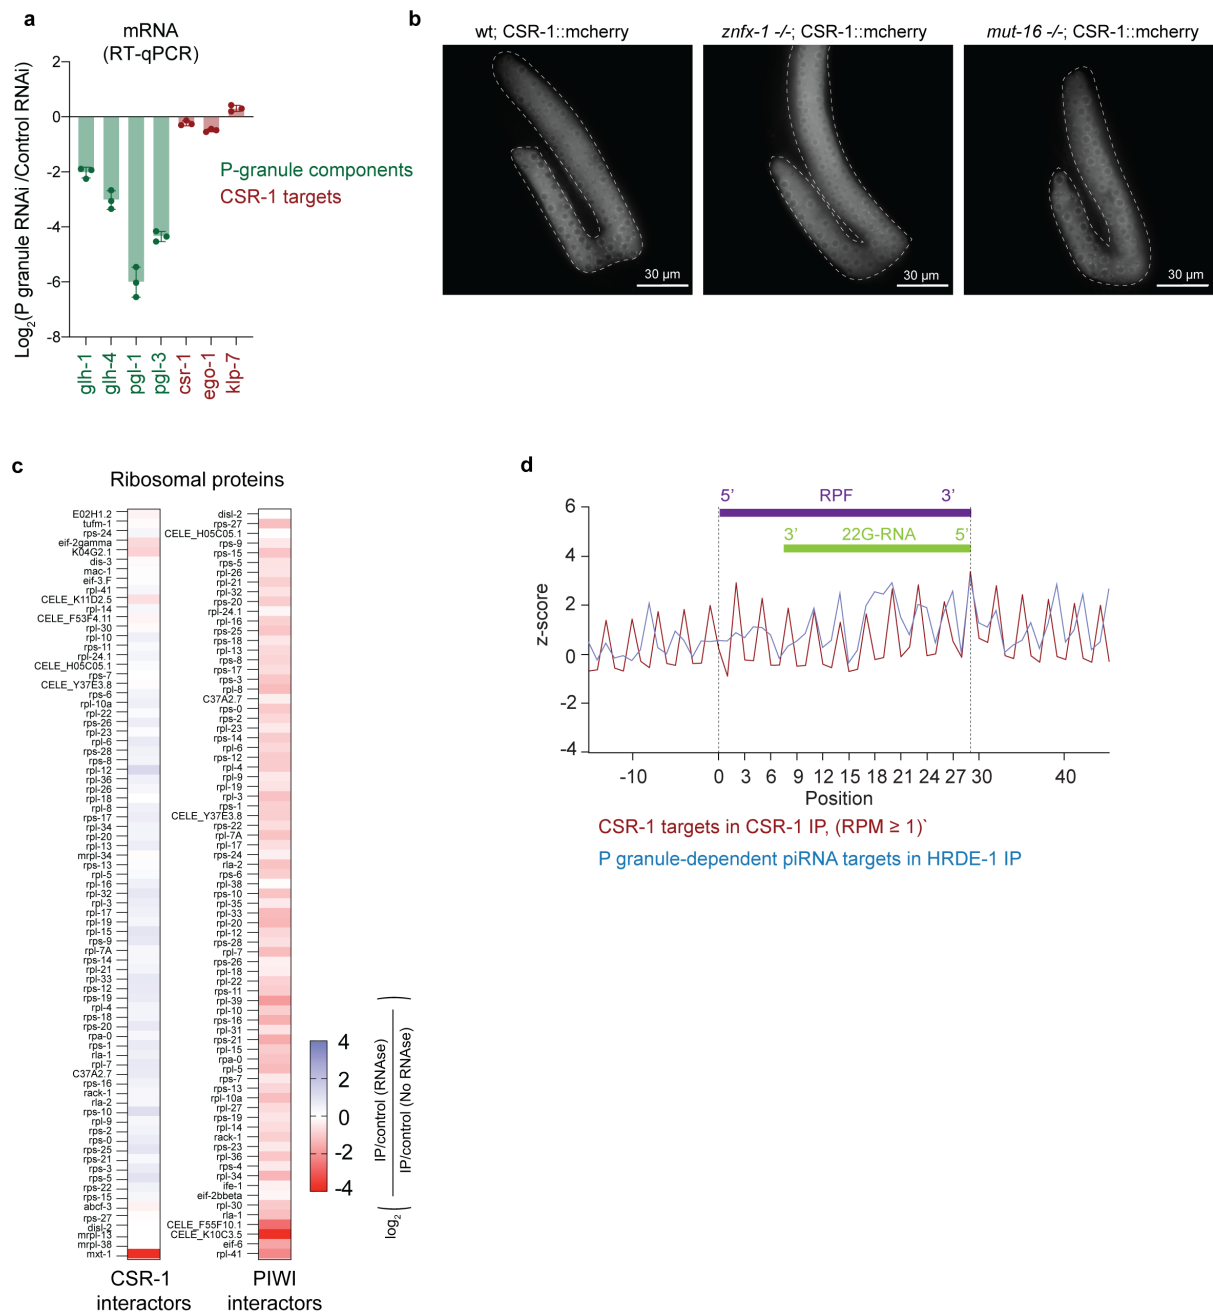

### Supplementary Fig. 7: CSR-1 localization in P granule vs cytosol

**a**, log<sub>2</sub> fold change in expression of *glh-1*, *glh-4*, *pgl-1* and *pgl-3* (germ granule components) and *csr-1*, *ego-1* and *klp-7* (CSR-1 targets) upon P granule RNAi compared to control RNAi by RT-qPCR for three biological replicates. Data is represented as mean ± SD. **b**, Live fluorescent images showing localization of mCherry:CSR-1 in WT, *znfx-1* <sup>-/-</sup> and *mut-16* <sup>-/-</sup>. CSR-1 is localized in the P granule as well as cytosol. At least five individual germlines were imaged. **c**, heat map comparing log<sub>2</sub> fold change for ribosomal interactors of CSR-1 and PIWI in the presence of RNase treatment compared to no RNase treatment. Ribosomal interactors are lost in PIWI and not in CSR-1 upon RNase treatment (Supplementary Data 3 and 5). n= 4

biological replicates. **d**, Plot showing the z-score for read density for the of 5' terminus of 22G-RNAs for CSR-1 targets ( $\text{RPM} \geq 1$ ) in CSR-1 IP and P granule dependent piRNA targets in HRDE-1 IP (gene list in Supplementary Data 1) relative to the start of 29-nt long Ribosomal protected fragments (RPF) (Related to Fig. 4e). Data is representative of two biological replicates. Source data are provided as a Source Data file.

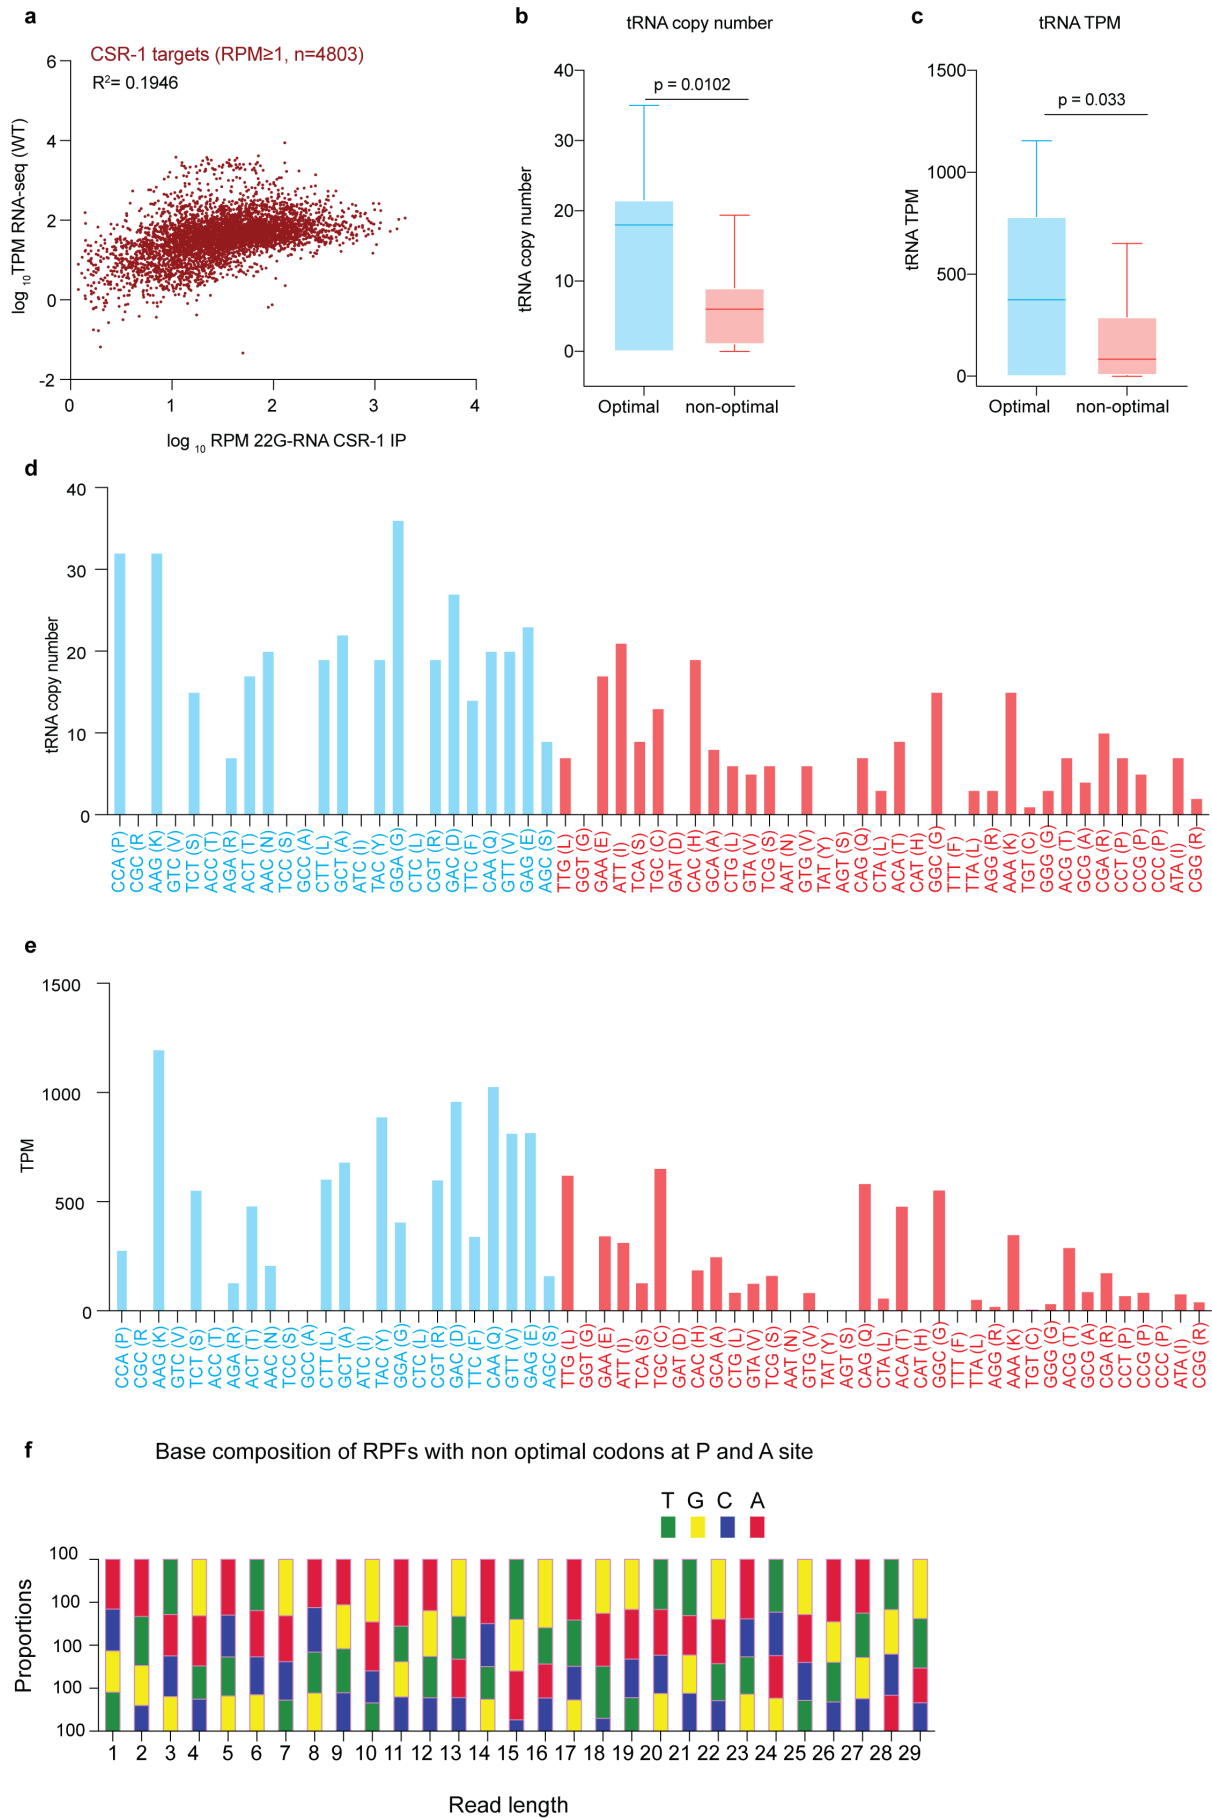

**Supplementary Fig. 8: tRNA copy number and expression for optimal and non-optimal codons.**

**a**, Scatter plot showing the comparison of  $\log_{10}$  RPM of 22G-RNAs from CSR-IP and  $\log_{10}$  TPM of mRNAs in WT for all CSR-1 targets. The sample size  $n$  (genes) is indicated in parentheses. Data is an average of 2 biological replicates. **b-c**, box plot showing the copy numbers for tRNAs for optimal or non-optimal codons (**b**), and the TPMs for tRNAs from the GRO-seq dataset for WT strain at the late 14 larval stage (44h) for optimal or non-optimal codons (**c**), as in Fig. 5, without adjusting for absent tRNAs. The line indicates the median value, the box indicates the first and third quartiles, and the whiskers indicate the 5<sup>th</sup> and 95<sup>th</sup> percentiles, excluding outliers. Two-tailed P values were calculated using Mann–Whitney–Wilcoxon tests. Data is an average of 2 biological replicates. **d**, Plot showing the copy number of tRNAs in the genome for each codon. **e**, Plot shows the tRNA pool's availability corresponding to each codon (TPM for tRNAs from GRO-seq,  $n$  = two biological replicates). **f**, Proportions of nucleotide composition for each position of RPF with A and P site occupied by non-optimal codons. Source data are provided as a Source Data file.

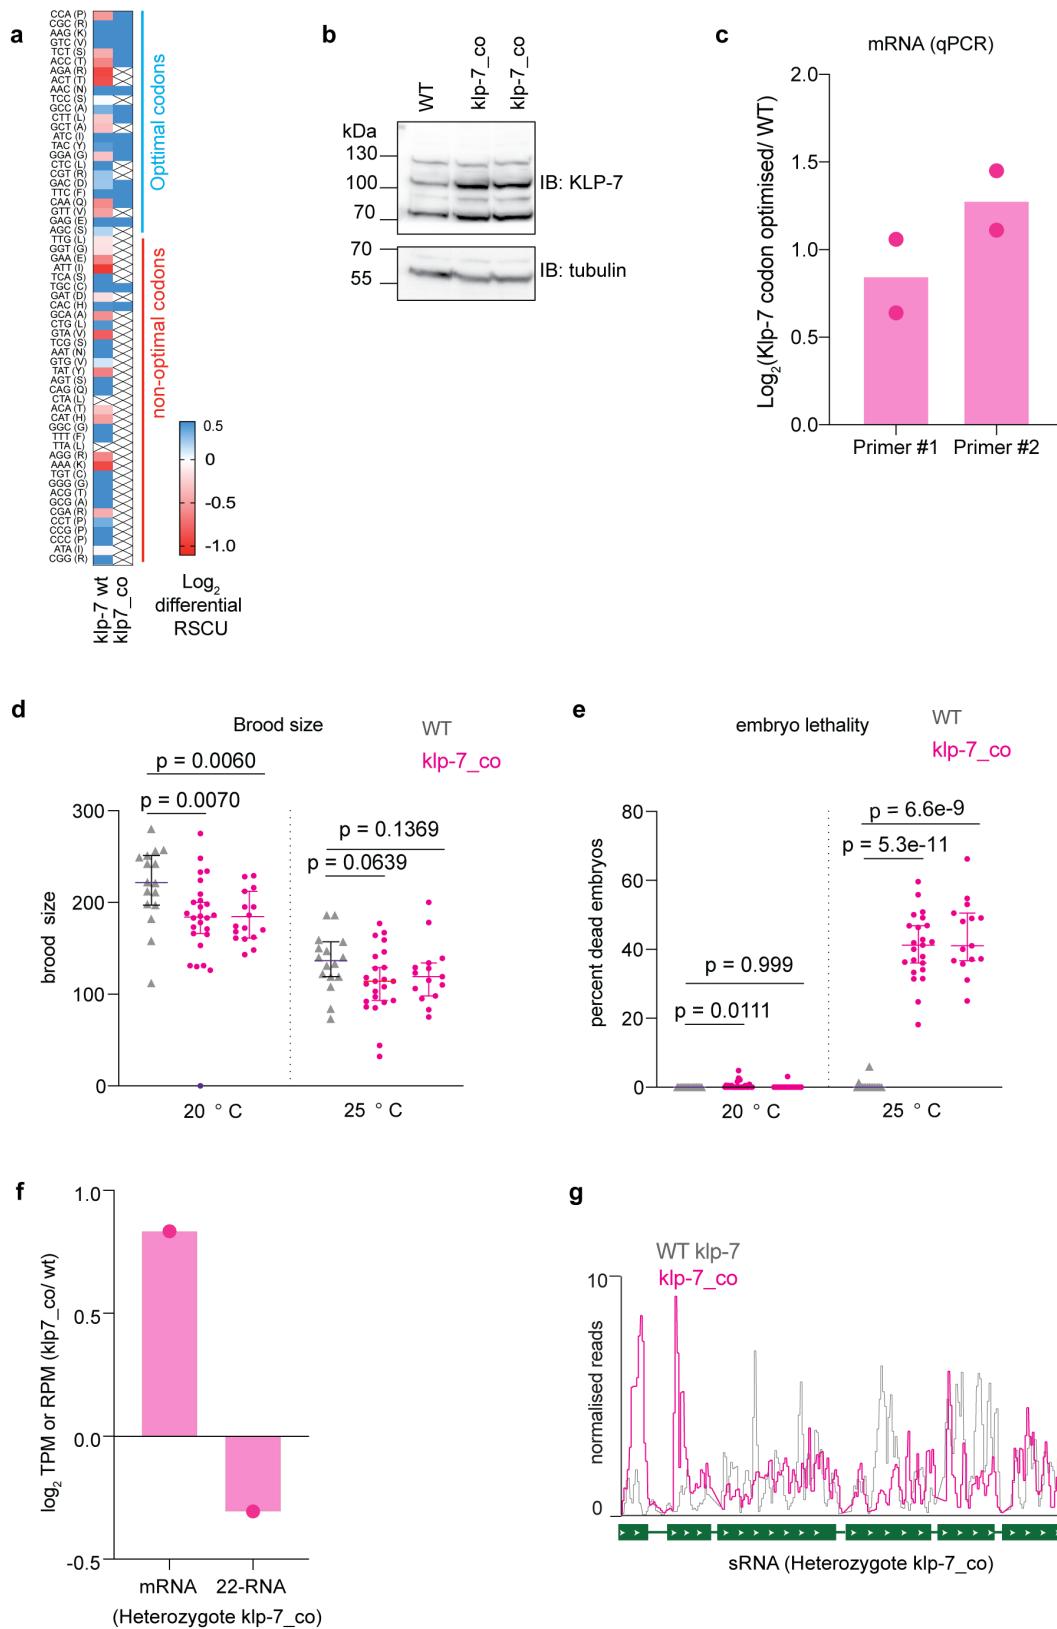

**Supplementary Fig. 9: Effects of codon optimization of CSR-1 target - *klp-7*.**

**a**, heat map showing  $\text{log}_2$  fold change in RSCU for either WT *klp-7* or *klp-7\_co* compared to genes showing neutral translational efficiency of 1 as explained in methods (similar to Fig. 5b, c). The blue line highlights optimal codons used by genes with high TE, and the red line



highlights non-optimal codons. × denotes an absence of the codon in the coding sequence. **b**, immunoblot showing expression of the KLP-7 protein in WT strain and *klp-7\_co* strain where endogenous *klp-7* was replaced by modified *klp-7\_co*, immunoblot for alpha-tubulin serves as the loading control. Data is representative of two experiments with two independent CRISPR-Cas9 lines for *klp-7\_co*. **c**, log<sub>2</sub> fold change in expression of *klp-7* in the *klp-7* codon-optimized strain, *klp-7\_co*, compared to WT *klp-7* in WT strain by RT-qPCR for two biological replicates used for sequencing in Fig. 6. Data are represented as mean. **d**, Brood size of WT strain and two independent CRISPR-Cas9 lines where modified *klp-7\_co* replaced endogenous *klp-7* at 20° and 25° C. **e**, Embryonic lethality observed in WT strain and the two independent CRISPR-Cas9 lines where modified *klp-7\_co* replaced endogenous *klp-7* at 20° and 25° C. For (**d-e**) n = 15 to 26 animals per condition were used. Data are represented as mean ± s.d. Two-tailed P values were calculated using Mann–Whitney–Wilcoxon tests. **f**, Plot showing log<sub>2</sub> fold change for normalized reads for mRNA and 22G-RNAs for the codon-optimized copy of *klp-7\_co* compared to WT copy *klp-7* from heterozygote worms, n=1. **g**, A genomic view of normalized reads of 22G-RNA reads antisense to WT copy of *klp-7* and codon-optimized *klp-7\_co* copy from heterozygote worms. Source data are provided as a Source Data file.
